# Supplementary material
Source: PubMed Central journal article supplement (PMC2288667)

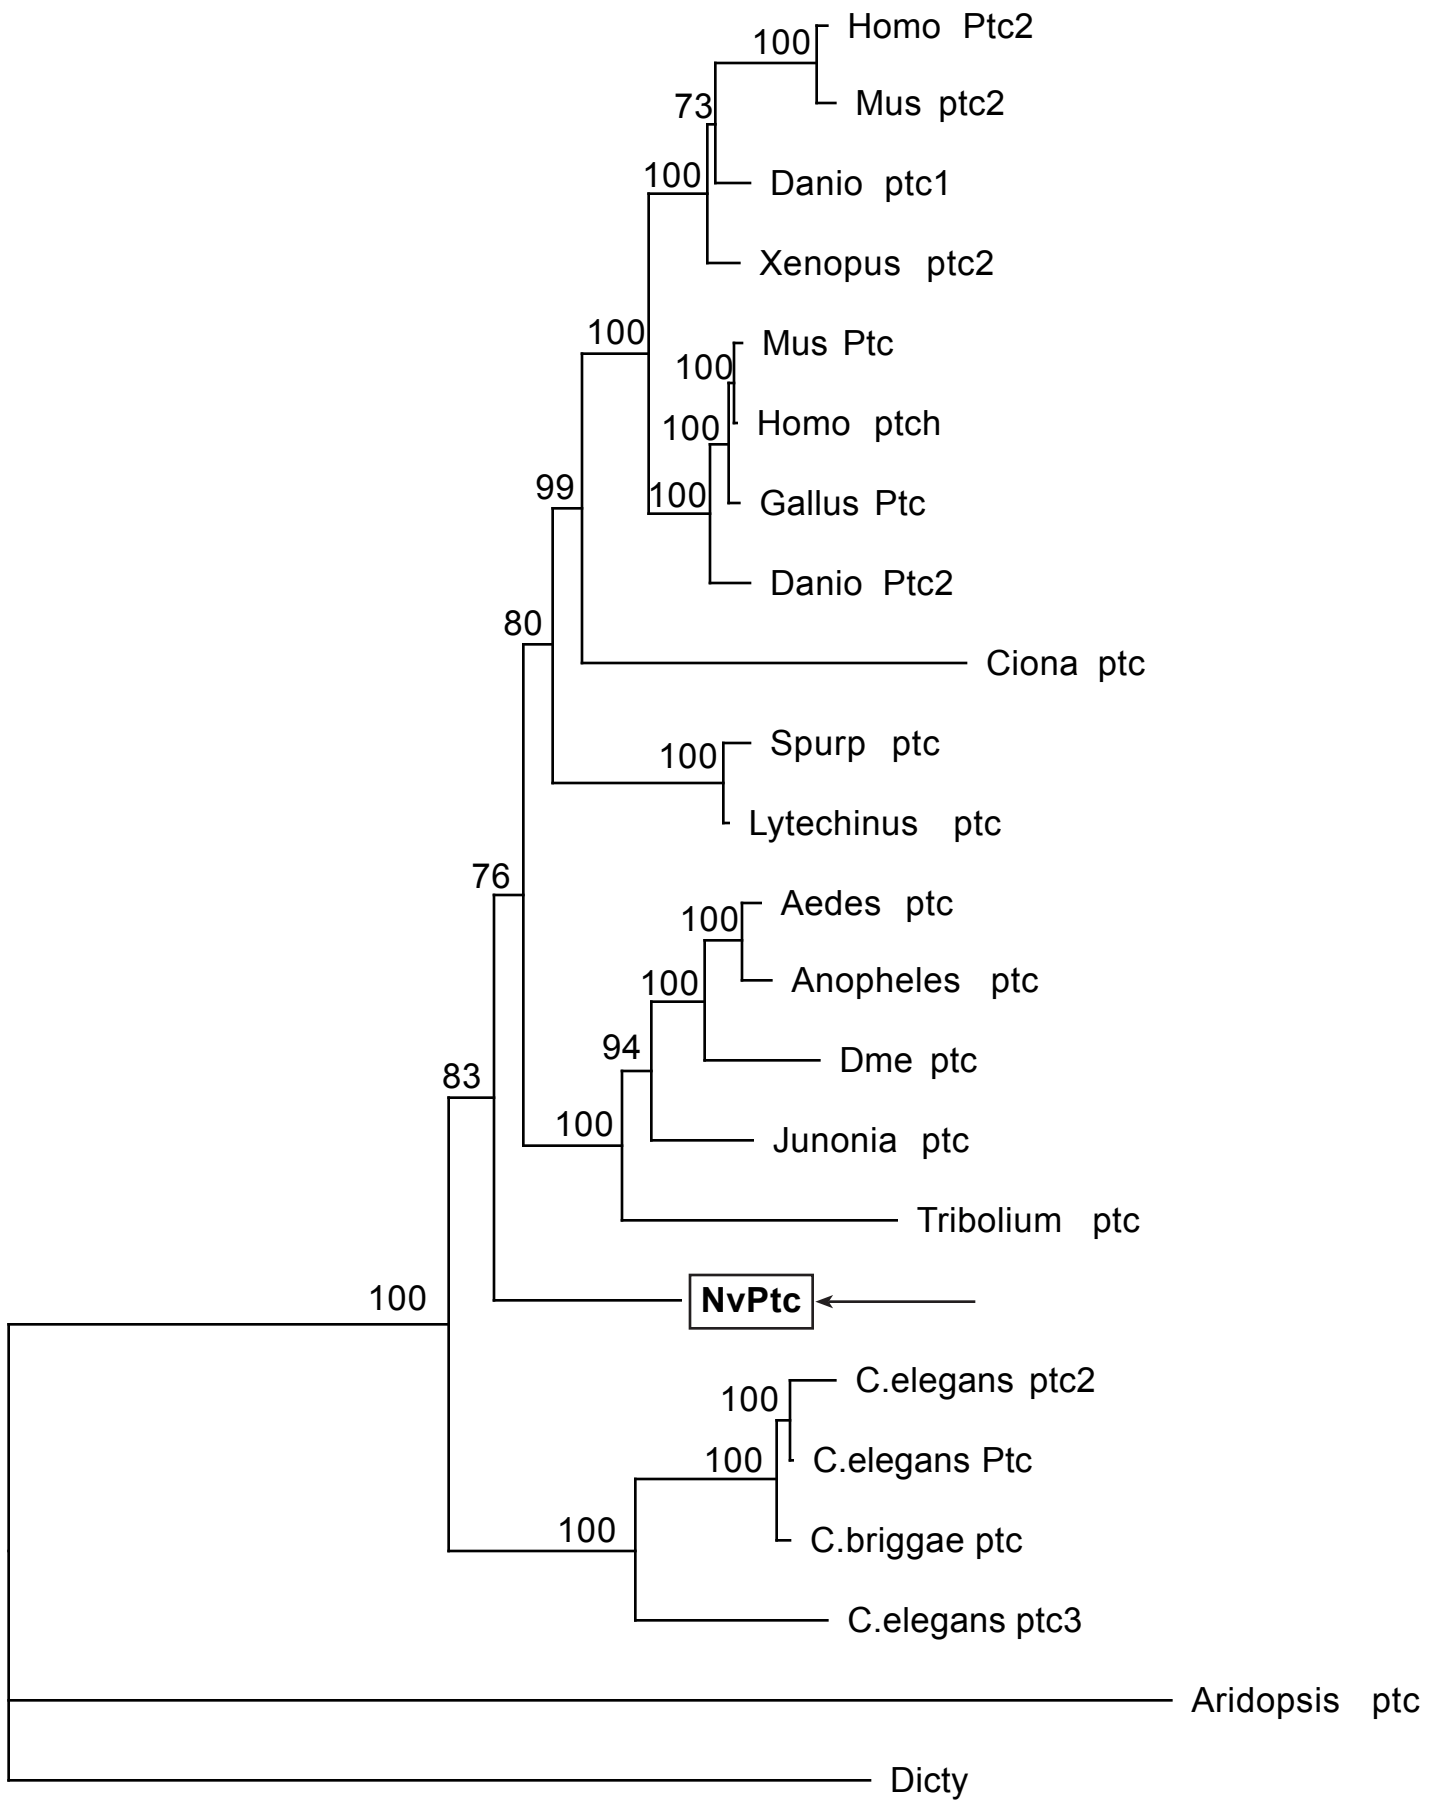

— 0.1

Supplement: NIHMS38763-supplement-02.pdf [file NIHMS38763-supplement-02.pdf]

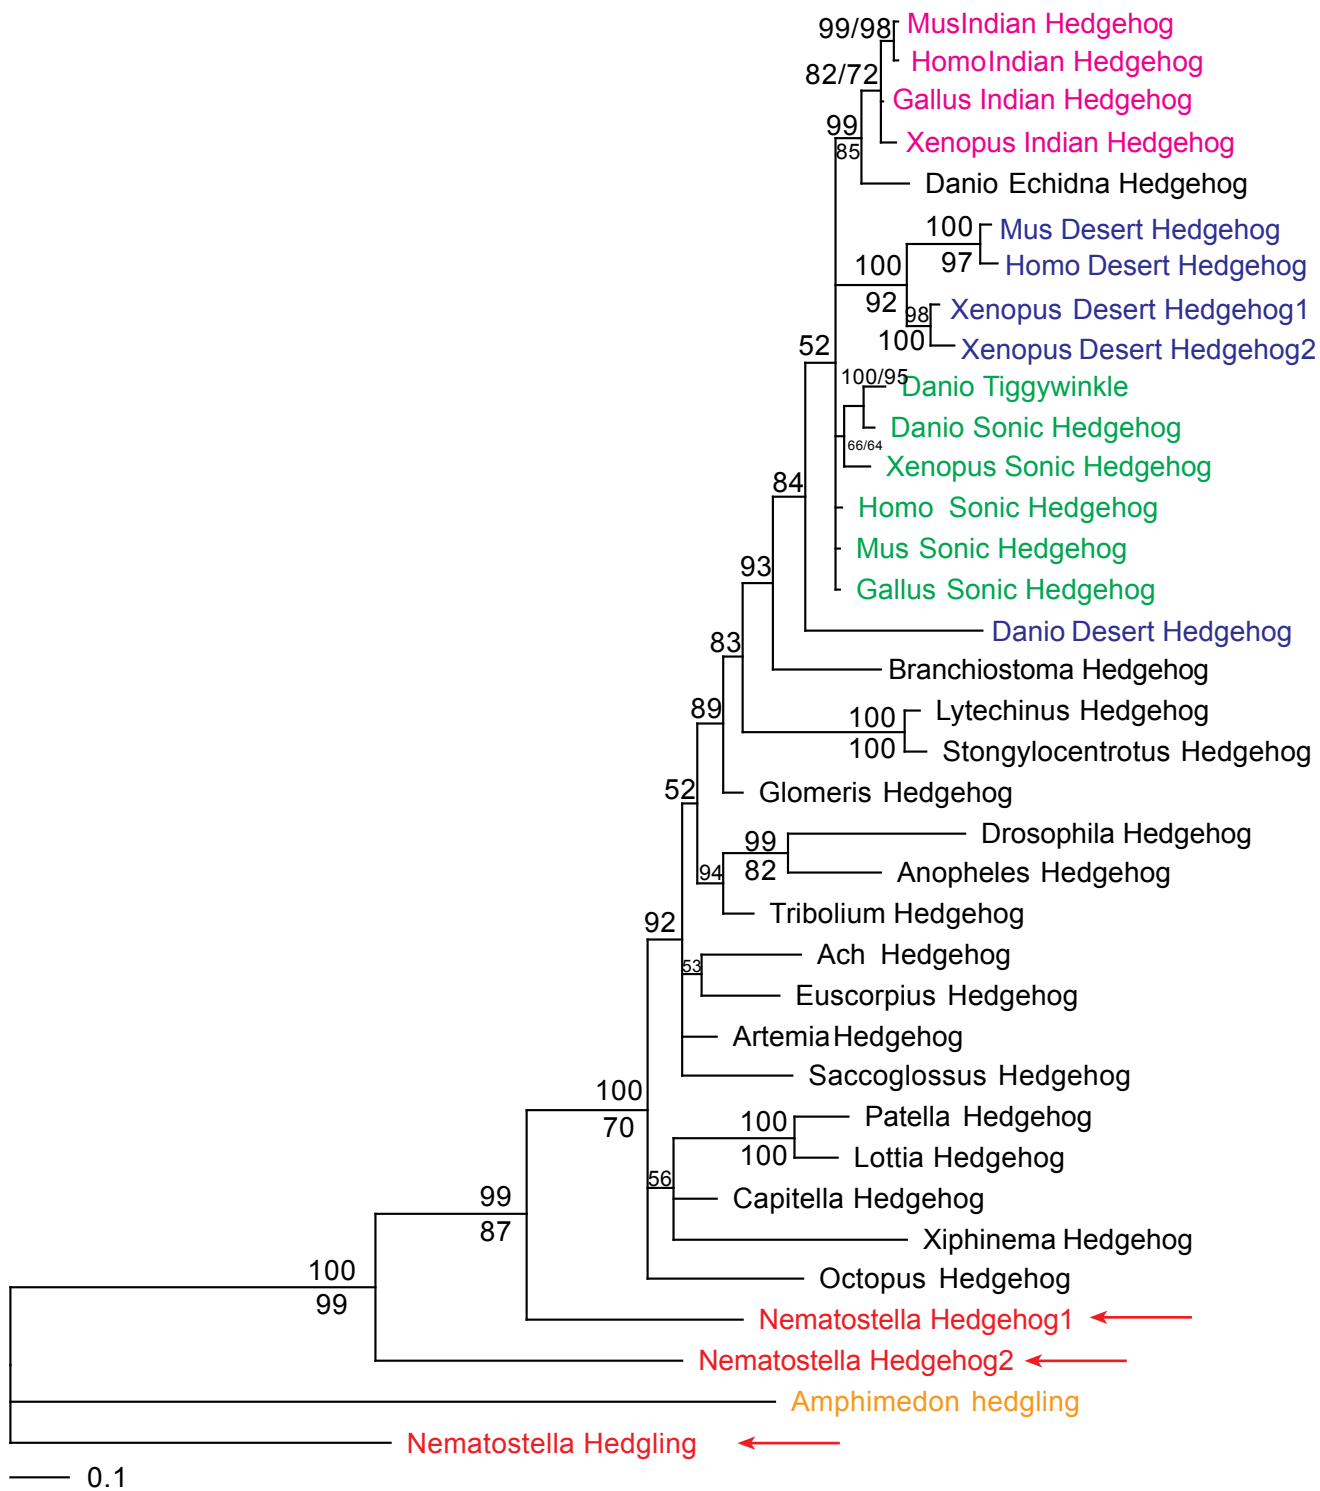

Supplement: NIHMS38763-supplement-09.pdf [file NIHMS38763-supplement-09.pdf]

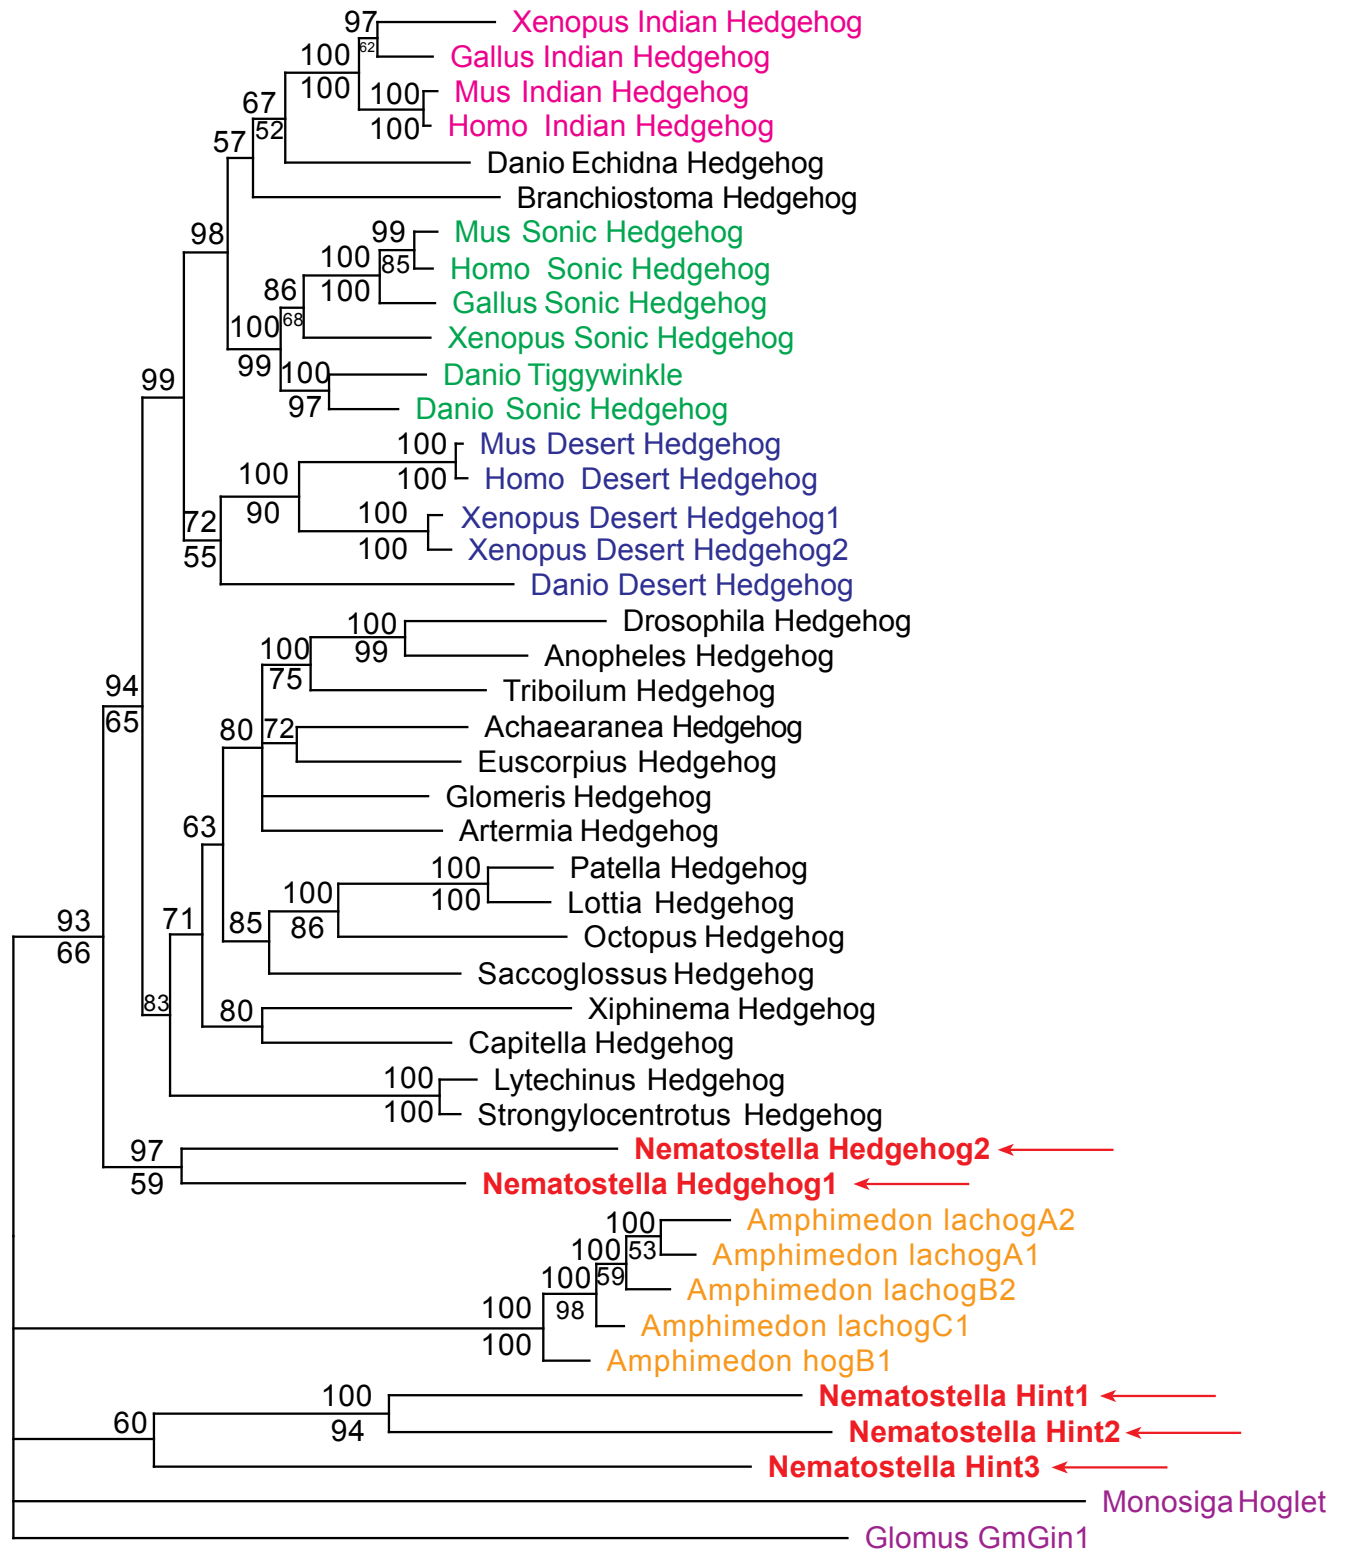

— 0.1

Supplement: NIHMS38763-supplement-10.pdf [file NIHMS38763-supplement-10.pdf]

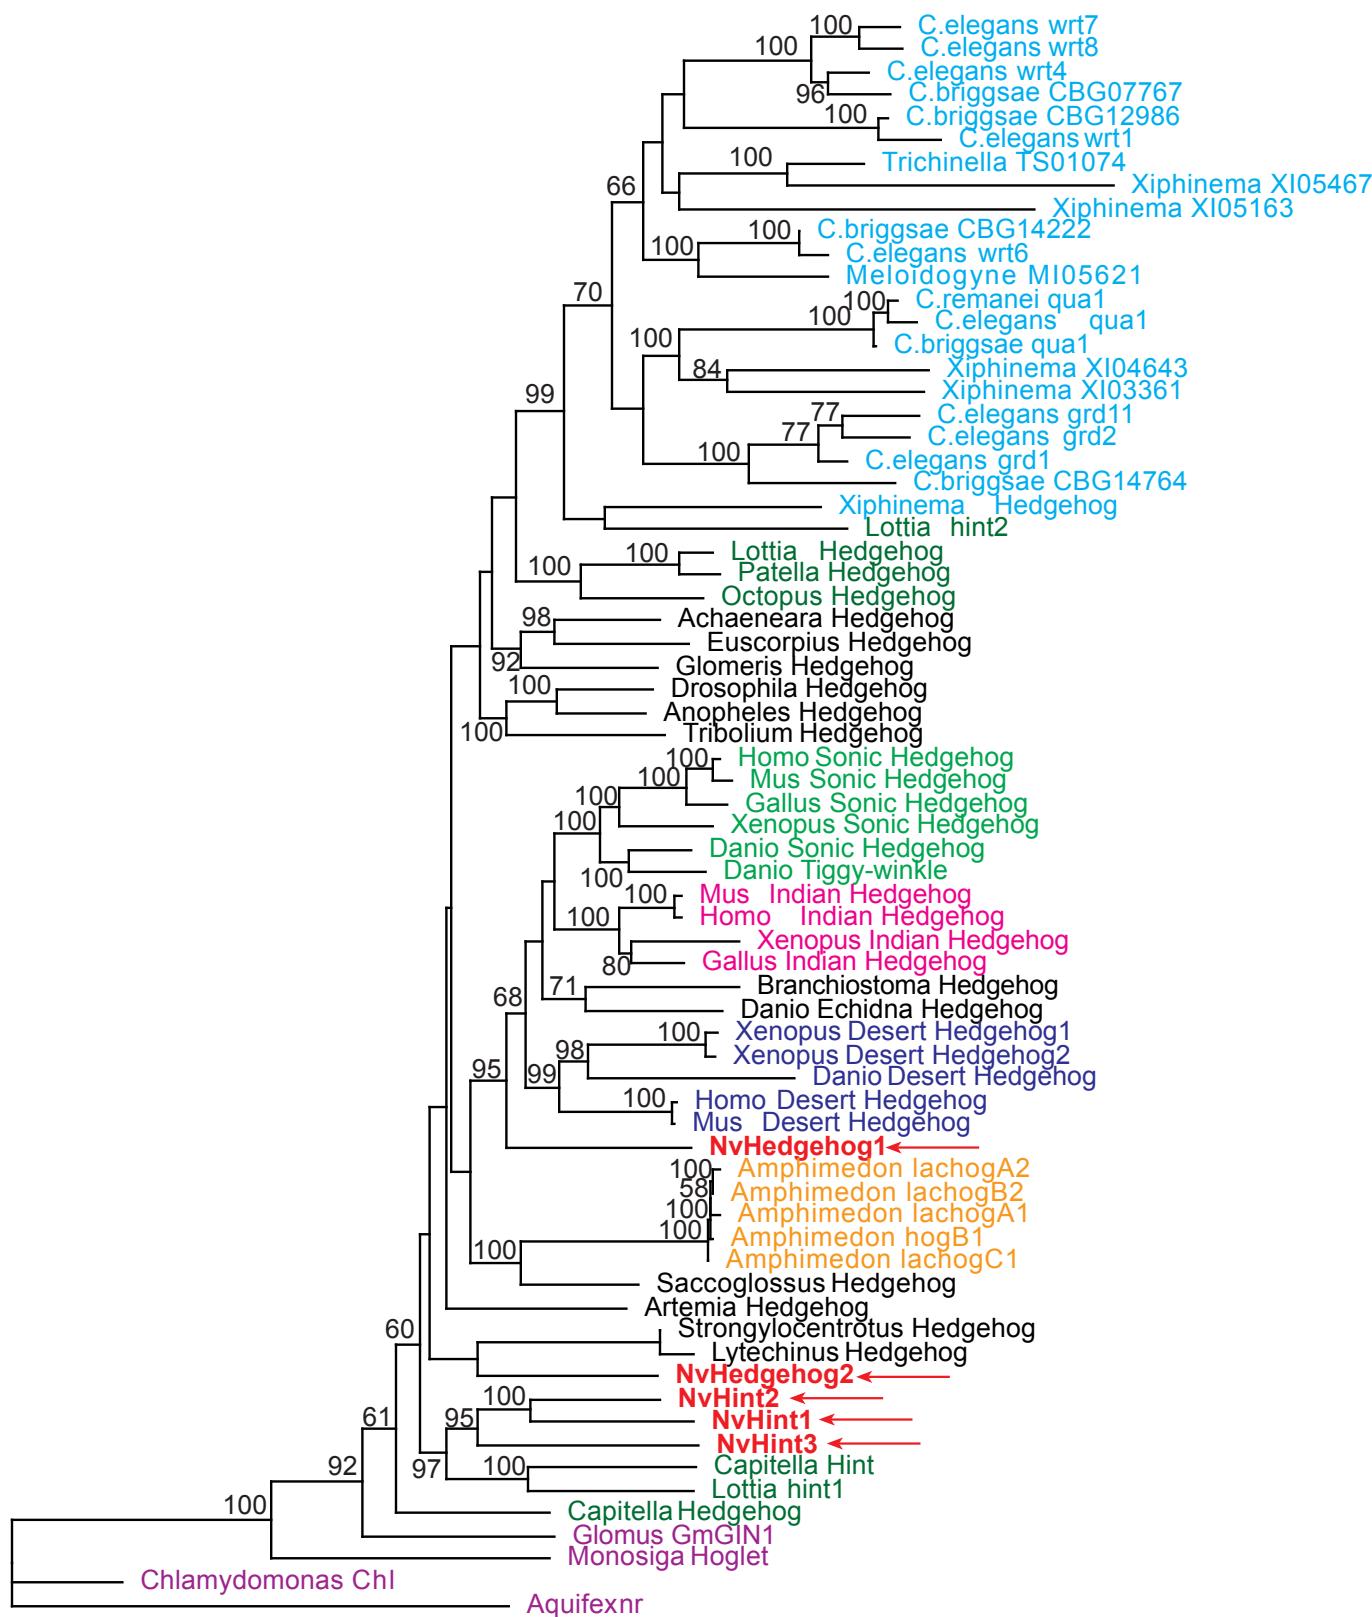

- 0.1

Supplement: NIHMS38763-supplement-11.pdf [file NIHMS38763-supplement-11.pdf]
